RESEARCH ARTICLE

# Circadian pattern of short-term variability of the QT-interval in primary prevention ICD patients - EU-CERT-ICD methodological pilot study

David J. Sprenkeler<sup>1\*</sup>, Anton E. Tuinenburg<sup>2</sup>, Henk J. Ritsema van Eck<sup>3</sup>, Marek Malik<sup>4</sup>, Markus Zabel<sup>5</sup>, Marc A. Vos<sup>1</sup>

**1** Department of Medical Physiology, Division of Heart and Lungs, University Medical Center Utrecht, Utrecht, The Netherlands, **2** Department of Cardiology, Division of Heart and Lungs, University Medical Center Utrecht, Utrecht, The Netherlands, **3** Department of Medical Informatics, Erasmus University Medical Center, Rotterdam, The Netherlands, **4** National Heart & Lung Institute, Imperial College London, London, United Kingdom, **5** Department of Cardiology and Pneumology, Division of Clinical Electrophysiology, University Medical Center Göttingen, Göttingen, Germany

\* [D.J.Sprenkeler@umcutrecht.nl](mailto:D.J.Sprenkeler@umcutrecht.nl)

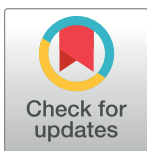

**OPEN ACCESS**

**Citation:** Sprenkeler DJ, Tuinenburg AE, Ritsema van Eck HJ, Malik M, Zabel M, Vos MA (2017) Circadian pattern of short-term variability of the QT-interval in primary prevention ICD patients - EU-CERT-ICD methodological pilot study. PLoS ONE 12(8): e0183199. <https://doi.org/10.1371/journal.pone.0183199>

**Editor:** Mathias Baumert, University of Adelaide, AUSTRALIA

**Received:** June 21, 2017

**Accepted:** July 31, 2017

**Published:** August 21, 2017

**Copyright:** © 2017 Sprenkeler et al. This is an open access article distributed under the terms of the [Creative Commons Attribution License](https://creativecommons.org/licenses/by/4.0/), which permits unrestricted use, distribution, and reproduction in any medium, provided the original author and source are credited.

**Data Availability Statement:** All relevant data are within the paper and its Supporting Information files.

**Funding:** EU-CERT-ICD has received funding from the European Community's Seventh Framework Programme FP7/2007-2013 under grant agreement no. 602299. The funder had no role in study design, decision to publish or preparation of the manuscript.

## Abstract

### Objective

Short-term variability of the QT-interval (STV-QT) was shown to be associated with an increased risk of ventricular arrhythmias. We aimed at investigating (a) whether STV-QT exhibits circadian pattern, and (b) whether such pattern differs between patients with high and low arrhythmia risk.

### Methods

As part of the ongoing EU-CERT-ICD study, 24h high resolution digital ambulatory 12-lead Holter recordings are collected prior to ICD implantation for primary prophylactic indication. Presently available patients were categorized based on their arrhythmia score (AS), a custom-made weighted score of the number of arrhythmic events on the recording. STV-QT was calculated every hour in 30 patients of which 15 and 15 patients had a high and a low AS, respectively.

### Results

The overall dynamicity of STV-QT showed high intra- and inter-individual variability with different circadian patterns associated with low and high AS. High AS patients showed a prominent peak both at 08:00 and 18:00. At these times, STV-QT was significantly higher in the high AS patients compared to the low AS patients (1.22ms±0.55ms vs 0.60ms±0.24ms at 08:00 and 1.12ms±0.39ms vs 0.64ms±0.29ms at 18:00, both  $p < 0.01$ ).

**Competing interests:** The authors have declared that no competing interests exist.

## Conclusion

In patients with high AS, STV-QT peaks in the early morning and late afternoon. This potentially reflects increased arrhythmia risk at these times. Prospective STV-QT determination at these times might thus be more sensitive to identify patients at high risk of ventricular arrhythmias.

## Introduction

Sudden cardiac death (SCD) due to ventricular arrhythmias remains an important health problem, accounting for approximately 60% of total cardiovascular mortality.[1] Prophylactic implantation of implantable cardioverter-defibrillators (ICD) was shown to reduce mortality in patients with a reduced left ventricular ejection fraction (LVEF).[2,3] LVEF reduction is presently used in international guidelines as a class I indication for ICD implantation in patients with left ventricular dysfunction.[4] However, LVEF lacks sensitivity and specificity of patients stratification, since a large proportion of patients suffering from sudden cardiac arrest have LVEF above the 35% cut-off.[5] Furthermore, in recent registries of ICD recipients, the incidence of appropriate shock [6,7] was found substantially lower than that reported in the original MADIT II and SCD-HeFT trials,[2,3] possibly explained by improved pharmacological heart failure treatment and ICD-programming algorithms. Consequently, up to two thirds of ICD recipients will never receive an appropriate ICD shock during their lives,[8] indicating that more accurate characterization of a patient at high SCD risk is urgently needed. In the search for better risk assessment, ECG-derived risk parameters are continuously investigated since the ECG is an inexpensive, easy to use, and widely accessible non-invasive tool.

Short-term variability of the QT-interval (STV-QT) is a relatively new ECG-based parameter that captures the repolarization instability in 30 consecutive beats.[9] An increased STV-QT was shown in patients with drug-induced and congenital long QT-syndrome and in patients with non-ischemic heart failure with a history of ventricular arrhythmias.[10–12] Presently, the predictive value of STV-QT is further evaluated in the primary prevention ICD-population as part of the European Comparative Effectiveness Research to assess the use of primary prophylactic Implantable Cardioverter Defibrillators (EU-CERT-ICD) study. In contrast to previous studies in which STV-QT was measured in 2-minute 12-lead ECG recordings, the EU-CERT-ICD study uses high resolution 24-hour Holter recordings for STV-QT analysis. The use of long-term recordings leads to the question of when to take a 30-beat sample during the 24 hours of the recording.

Yet, little is known about the STV-QT changes during the day and/or whether the circadian pattern of STV-QT is different in patients at low and high SCD risk. If such a difference exists, calculation of STV-QT at a certain time of the day might increase the sensitivity and specificity of this parameter in identifying the patients at risk. Therefore, as a methodological pilot study of EU-CERT-ICD, we aimed at investigating (a) whether STV-QT exhibits a circadian pattern and (b) whether this pattern differs between high and low risk patients.

## Materials & methods

### Study design

The EU-CERT-ICD study is a currently enrolling prospective, multicenter, observational study (NCT 02064192) that aims to assess electrocardiographic parameters for prediction of

all-cause mortality and appropriate ICD-shocks. The study plans to recruit 2500 patients with ischemic and non-ischemic cardiomyopathy fulfilling the international treatment guidelines criteria for primary prophylactic ICD implantation.[13] Patients who are candidate for cardiac resynchronization therapy (CRT) or secondary prophylactic ICD are excluded. The protocol was approved by the institutional review board or ethics committee at each participating hospital and was in compliance with the Declaration of Helsinki. All patients provided written informed consent.

Clinical characteristics including age, sex, race, NYHA class, comorbidities and cardiovascular drug treatment are collected at baseline. Prior to ICD implantation, all patients also undergo a 24-hour 12-lead digital Holter recording using the SEER 12 recorder programmed at 1024 Hz sampling frequency (Getemed, Teltow, Germany). In addition to STV-QT, other ECG-derived parameters, including microvolt T-wave alternans, heart rate variability, heart rate turbulence, and T-wave morphology will be prospectively assessed for the risk stratification purposes. In the current methodological pilot study, STV-QT of 30 cardiac cycles was determined at the beginning of every hour during the 24h recording in a subpopulation of already enrolled patients.

## Measurement of STV-QT

STV-QT was determined in lead V2 and was calculated using the method of fiducial segment averaging (FSA).[14] First, each QRS-complex was aligned around a trigger point (usually the R-peak) by cross correlating each individual complex with the average of the other complexes and then shifted until maximal correlation is achieved. Next, the different fiducial points, i.e. the QRS-onset and the end of T-wave, were aligned separately by the same technique using a segment of 30 samples around the fiducial point. Correct alignment was checked visually by one of the authors (D.S.) and manually adjusted where necessary. The advantage of our custom-made software is that the program preserves the amount of shifting for each individual beat and thus the QT-interval of each beat can be derived from the individual fiducial point estimates.

Using Poincaré plots, the QT-interval of each complex was plotted against the former. STV-QT was defined (as proposed by Thomson et al. [15]) as the mean orthogonal distance of the points to the line of identity, calculated by the formula  $\sum |D_{n+1} - D_n| / N \times \sqrt{2}$ , where D represents the QT-interval and N is the number of beats (30 in this case). Ventricular and atrial premature complexes together with the following post-extrasystolic beat were excluded from the analysis. In addition to STV-QT, both the RR-interval and QT-interval of the 30 beats were measured automatically.

## Endpoints

No definite endpoints, e.g. all-cause mortality or appropriate ICD shocks, are presently known. Nevertheless, previous studies have shown that the presence of non-sustained ventricular tachycardia (nsVT) and/or a high frequency of premature ventricular complexes (PVC) are independent predictors of SCD and/or appropriate ICD shocks.[16,17] Therefore, to differentiate between high and low risk patients, the number of arrhythmic events on the Holter recording was used as a surrogate endpoint. A custom-made arrhythmia score (AS) was designed for this purpose and described in Table 1. Arbitrarily and solely for the purposes of this methodological pilot study, patients were classified based on their AS into three groups: low AS (< 100 points/24h), moderate AS (between 100 and 1000 points/24h) and high AS (>1000 points/24h). Only low AS and high AS patients were included in the present methodological study in order to differentiate clearly between low and high arrhythmia risk.

**Table 1. Arrhythmia score (AS).**

| Arrhythmic event                 | points |
|----------------------------------|--------|
| Single PVC                       | 1      |
| Couplet                          | 2      |
| Triplet                          | 3      |
| Bigeminy                         | 4      |
| Non-sustained VT (> 3 complexes) | 5      |

AS is defined as the sum of the points per 24 hours

<https://doi.org/10.1371/journal.pone.0183199.t001>

## Statistical analysis

Data are expressed as mean  $\pm$  standard error of the mean (SEM). Repeated ANOVA with Bonferroni correction for multiple comparisons was used for within group analysis. Between-group analysis was performed using two-tailed Student t-test assuming different variances. Pearson's correlation coefficients were used for correlation analyses. Calculations were performed using SPSS (version 23, IBM). P-values  $\leq 0.05$  were considered significant.

## Results

Out of the EU-CERT-ICD Holter database, AS was assessed for already enrolled patients. Patients with atrial fibrillation, less than 23 hours of noise-free recording or flat T-waves in the precordial leads were excluded. A total of 30 patients were selected based on their AS, of which 15 and 15 patients had a high and low AS, respectively.

### Baseline criteria

Table 2 shows baseline characteristics of the patients included in the analysis. The mean age was  $60 \pm 2$  years and 80% were men. Patients with high AS appeared to be slightly but not significantly older compared to the low AS patients ( $p = 0.06$ ). A slight majority of patients had ischemic cardiomyopathy (53%) with a mean left ventricular ejection fraction of  $27\% \pm 1\%$ . Significantly more patients in the high AS group had hypertension. The use of heart failure medications was not different between the two groups.

### Diurnal pattern of RR and QT

The circadian profile of RR- and QT-intervals is shown in Fig 1. As expected, both show higher values at night with a peak at around 04:00, a clear drop in the morning and significantly lower values during the day. No significant differences were found in RR-interval between the low AS and high AS group (Fig 1B). The QT-interval of the high AS appeared to be slightly but not significantly longer than that of the low AS group during the day.

### Diurnal pattern of STV-QT

No clear circadian pattern of STV-QT was found in the total cohort. Nevertheless, two small non-significant peaks are visible at 08:00 and 18:00 (Fig 2). A high intra- and inter-individual variability of STV-QT was seen, mainly in the high AS group (Fig 3). A different hour-by-hour behaviour of STV-QT was seen in the low AS-group and high AS-group (Fig 4). While the low AS patients showed a more-or-less stable STV-QT during the day with low variability, high AS patients showed significant STV-QT peaks ( $p < 0.05$ ) at 08:00 and 18:00. At these time points,

**Table 2. Baseline characteristics of study cohort (n = 30).**

| Mean ± SEM or N (%)                        | low AS (n = 15) | high AS (n = 15) | Total (n = 30) |
|--------------------------------------------|-----------------|------------------|----------------|
| <b>Age, years</b>                          | 55.8 ± 3.4      | 64.3 ± 2.4       | 60.1 ± 2.2     |
| <b>Sex</b>                                 |                 |                  |                |
| Female                                     | 3 (20%)         | 2 (13.3%)        | 5 (17%)        |
| Male                                       | 12 (80%)        | 13 (86.7%)       | 25 (83%)       |
| <b>Leading cardiac disease</b>             |                 |                  |                |
| DCM                                        | 7 (46.7%)       | 6 (40%)          | 13 (43%)       |
| ICM                                        | 8 (53.3%)       | 9 (60%)          | 17 (57%)       |
| <b>LVEF, percentage</b>                    | 26.8 ± 1.7      | 27.0 ± 1.7       | 26.9 ± 1.2     |
| <b>NYHA</b>                                |                 |                  |                |
| I or II                                    | 11 (73%)        | 9 (60%)          | 20 (67%)       |
| III                                        | 4 (27%)         | 6 (40%)          | 10 (33%)       |
| <b>Smoking</b>                             | 11 (73.7%)      | 10 (66.7%)       | 21 (70%)       |
| <b>Diabetes mellitus</b>                   | 5 (33.3%)       | 7 (46.7%)        | 12 (40%)       |
| <b>hypertension</b>                        | 4 (26.7%)       | 13 (86.7%)*      | 17 (57%)       |
| <b>Beta-blocker</b>                        | 14 (93.3%)      | 14 (93.3%)       | 28 (93%)       |
| <b>ACEi/ARB</b>                            | 15 (100%)       | 13 (86.7%)       | 28 (93%)       |
| <b>MRA</b>                                 | 12 (80%)        | 15 (100%)        | 27 (90%)       |
| <b>statin</b>                              | 12 (80%)        | 11 (73.3%)       | 23 (77%)       |
| <b>Class I or III antiarrhythmic drugs</b> | 1 (6.7%)        | 2 (13.3%)        | 3 (10%)        |

\* p < 0.05 high AS vs low AS. AS = arrhythmia score; DCM = dilated cardiomyopathy; ICM = ischemic cardiomyopathy; NYHA = New York Heart Association; ACEi = ACE-inhibitor; ARB = angiotensin II receptor blocker; MRA = mineralocorticoid receptor antagonist.

<https://doi.org/10.1371/journal.pone.0183199.t002>

STV-QT was significantly higher in high AS patients compared to low AS patients (1.22ms ± 0.55ms vs 0.60ms ± 0.24ms at 08:00 and 1.12ms ± 0.39ms vs 0.64ms ± 0.29ms at 18:00, both p < 0.01). At other time points, 07:00, 12:00 and 16:00, STV-QT was also increased in the high AS group, but the differences were less expressed. At several time points, especially during the night, STV-QT did not differ between the low and high AS groups.

## Discussion

The presented results show (a) STV-QT intra- and interindividual variability, and (b) distinct STV-QT peaks in the early morning and late afternoon that are not seen in the low AS patients. Interestingly, at both of these time points the QT interval was the shortest. In previous animal studies, a positive relation was found between STV and action potential durations (APD) with higher STV at longer APD.[18] This can be explained by the absolute increase in APD variation at longer APD and does not reflect higher repolarization instability. Nevertheless, the opposite was found in the high AS patients in the current study: the highest STV-QT was seen when QT-interval was the shortest. This implies that an independent proarrhythmic component might be partly responsible for this STV-QT increase.

In previous STV-QT clinical studies, a 2-minute ECG was taken at arbitrary during day-time hours. Nevertheless, as we have shown, the discriminative power of STV-QT varies substantially between 8.00 and 17:00. For instance, in the data of this patient sub-population, samples taken around 14:00 or 15:00 would be less useful for the distinction between the low and high AS groups. It seems plausible to propose that sampling at the time points of 8:00 or 18:00 might increase the predictive capabilities of STV-QT.

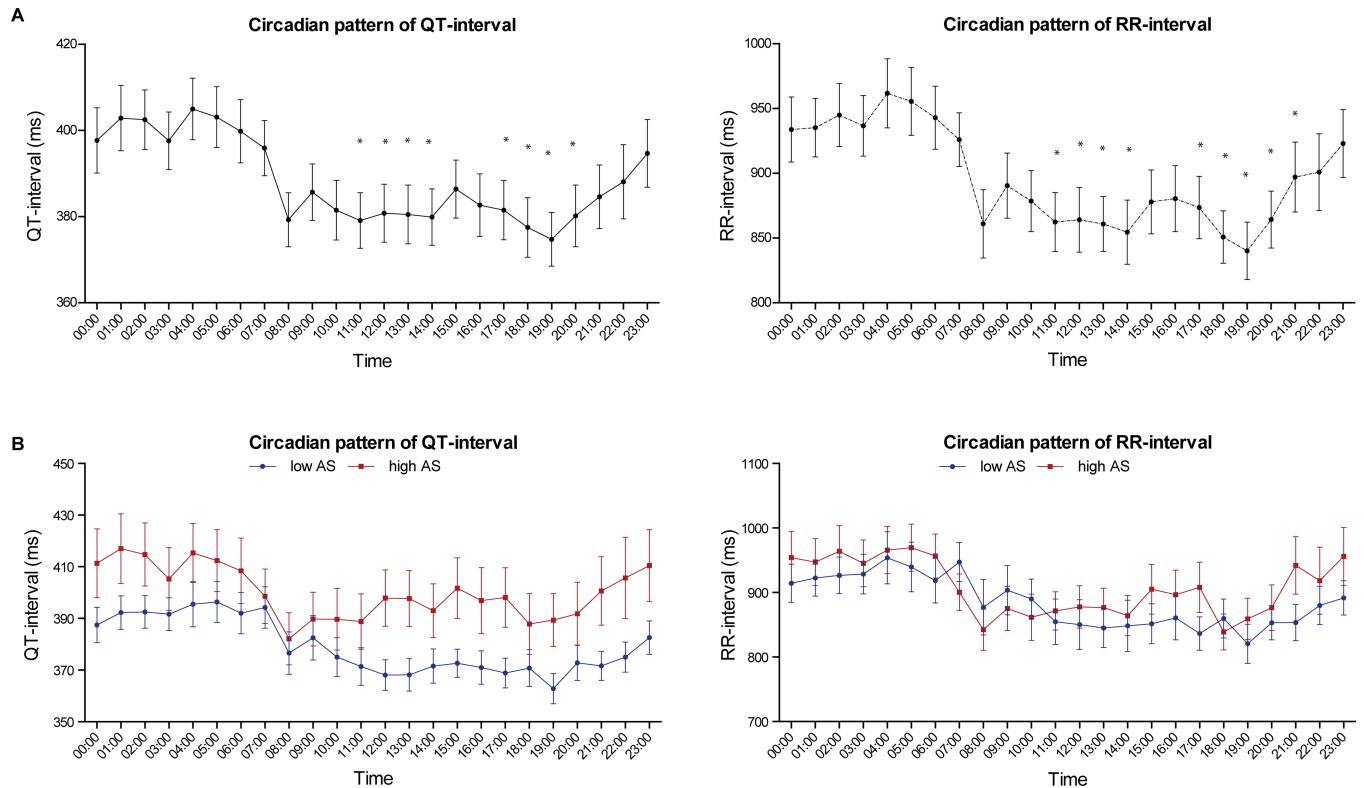

**Fig 1. Circadian pattern of RR- and QT-interval.** (A) mean  $\pm$  SEM at beginning of every hour of total cohort (n = 30). Significant higher values are seen at night compared to during the day. \* = p < 0.05 compared to 0:00. (B) Mean  $\pm$  SEM at beginning of every hour of low AS-group (blue line, n = 15) and high AS group (red line, n = 15). No significant differences are found in the circadian pattern of RR-interval or QT-interval between low and high AS group.

<https://doi.org/10.1371/journal.pone.0183199.g001>

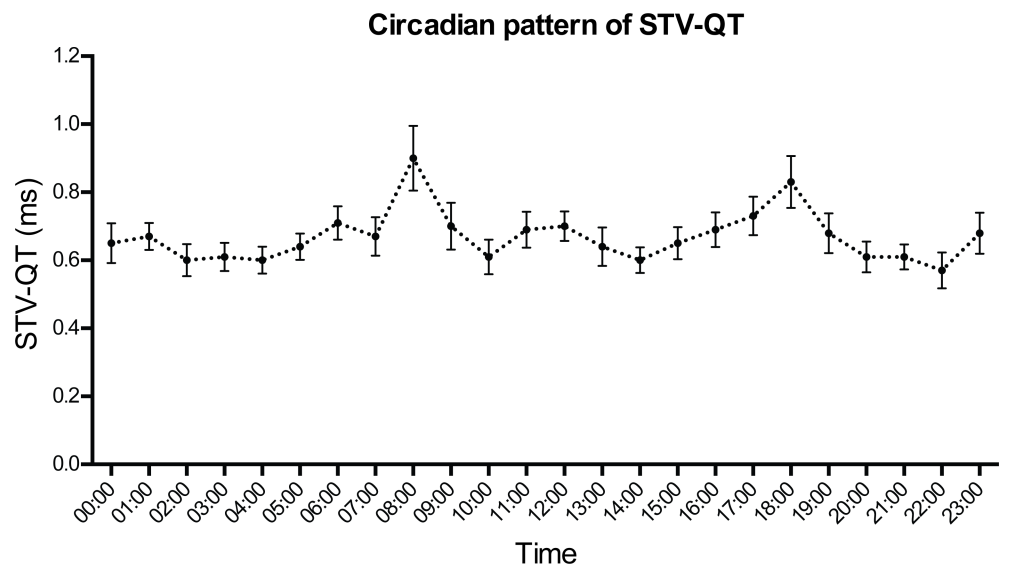

**Fig 2. Circadian pattern of STV-QT.** Mean  $\pm$  SEM at beginning of every hour of total cohort (n = 30). No clear circadian pattern is found, however, two non-significant peaks at 08:00 and 18:00 can be discerned.

<https://doi.org/10.1371/journal.pone.0183199.g002>

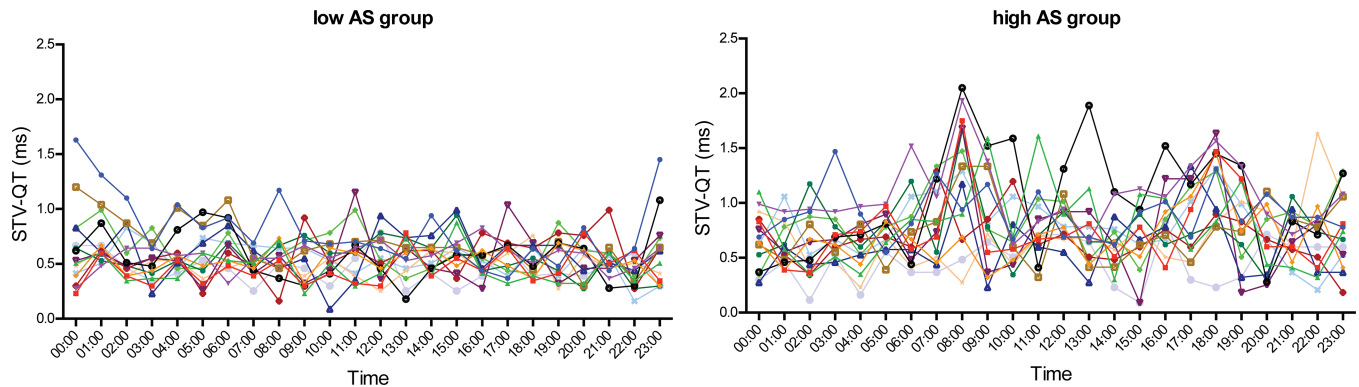

**Fig 3. Circadian pattern of STV-QT in individual patients.** Individual patients in low AS group (left) and high AS group (right). High inter- and intraindividual variability can be seen, which is more pronounced in the high AS group.

<https://doi.org/10.1371/journal.pone.0183199.g003>

### STV-QT as a marker of arrhythmic risk

Finding a highly sensitive and specific ECG-derived parameter predictive for sudden cardiac death remains the holy grail in the field of electrocardiology. In particular, a risk stratification technique is urgently needed that identifies arrhythmic rather than overall mortality risk. The most promising ECG-based risk parameters, such as microvolt T-wave alternans [19] or QT-variability index (QTVI)[20] are markers of abnormal repolarization and reflect the electrical substrate that predisposes to ventricular arrhythmias. However, none of these parameters have yet been incorporated into clinical practice. STV-QT has the advantage to reflect instability of repolarization on a consecutive basis and can be measured on 30 complexes instead of 256 complexes that are required to calculate QTVI. The method of fiducial segment averaging eliminates the problem of identification of the end of the T-wave of every complex separately, therefore diminishes measurement error.[14] STV-QT has been investigated in a number of

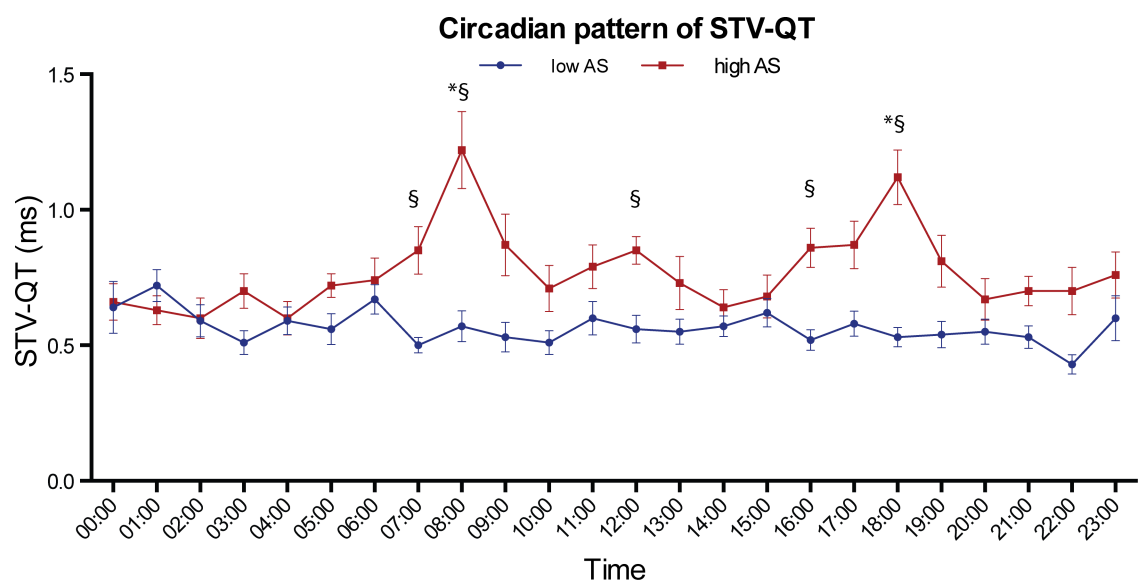

**Fig 4. Circadian pattern of STV-QT in AS subgroups.** Mean  $\pm$  SEM at beginning of every hour in low AS (blue line, n = 15) and patients with high AS (red line, n = 15). \* p < 0.05 compared to 0:00; § p < 0.05 compared to low AS. STV-QT peaks at 08:00 and 18:00 in high AS patients, but is stable during the day in low AS patients.

<https://doi.org/10.1371/journal.pone.0183199.g004>

retrospective studies with a wide variety of populations that are at risk of SCD and shows potential for arrhythmic risk prediction. As part of the EU-CERT-ICD study this parameter will be evaluated prospectively in a large cohort of primary prophylactic ICD patients to further establish its role in risk stratification.

### Circadian pattern of STV-QT resembles circadian profile of sudden cardiac death

Interestingly, the distinct peaks of STV-QT in the early morning and late afternoon in the high AS patients resemble the circadian distribution of sudden cardiac death found in large population-based studies.[21,22] These large studies found a peak between 6:00 and noon and a secondary lower peak between 17:00 and 18:00. The same diurnal distribution was found in studies investigating the circadian variation of appropriate ICD-shocks.[23,24] The increased incidence of SCD in the morning may be linked to arousal-related increase of the sympathetic tone, which might increase the myocardial electrical instability and decrease the threshold for ventricular fibrillation. In experimental studies, left stellate ganglion nerve activity (SGNA), which reflects discharge of the sympathetic nervous system, was reported to show similar circadian profile with a high peak in the early morning in dogs with pacing induced heart failure or experimentally induced myocardial infarction.[25–27] SGNA increase was also shown to precede the occurrence of ventricular arrhythmia.[28]

### QT variability and the autonomous nervous system

A relation between autonomic tone and higher beat-to-beat QT variability has previously been reported. Yeragani et al investigated the effect of posture and isoproterenol infusion on QT variability and described significantly higher QT variability in standing position and after the infusion of isoproterenol.[29] Recently, a significant correlation was shown between elevated STV-QT and parameters of sympathetic predominance in patients with impaired glucose tolerance.[30] A study by Piccirillo et al. found a positive relation between the level of anxiety and a high QTVI.[31] On the other hand, QT variability was significantly reduced after administration of metoprolol or carvedilol compared to placebo in patients with ischemic cardiomyopathy.[32] Also, in a SGNA activity study, the dogs with high sympathetic activity showed significantly higher QT variability index compared to dogs with low sympathetic activity.[33] Noteworthy, this difference was only seen in the dogs with pacing-induced heart failure. Although all these studies used other QT-variability expressions, it seems reasonable to expect the same differences for STV-QT.

The increased beat-to-beat repolarization variability during high adrenergic drive might be caused by the autonomous nervous system effects during reduced repolarization reserve. In cellular experiments under baseline conditions, selective  $I_{K_s}$  blockade does neither increase repolarization variability nor results in arrhythmias because of compensatory effects of other repolarizing currents[34]. However, when  $\beta$ -adrenergic stimulation is added to  $I_{K_s}$  blockade, repolarization variability increases significantly and early and delayed afterdepolarizations start to occur.

In our study population, i.e. patients with left ventricular dysfunction, a reduced repolarization reserve is likely because of repolarizing currents downregulation.[35] Sympathetic activity during arousal might thus exhaust the repolarization reserve explaining the STV-QT rise. The reasons for the second peak in the late afternoon are more speculative. Its might be related to periprandial changes in the autonomic modulations.



## Limitations

The present study has important limitations. First, because of nature of a methodological pilot study, the sample size is small. Second, we used a custom-made score of the number of arrhythmic events on the Holter recording to categorize patients into high and low arrhythmic risk. Whilst this might reasonably correspond to some previous publications, we have no data on actual arrhythmic risk in these patients. A recent study by Seegers et al[16] found a high number of premature ventricular complexes predicting appropriate ICD shocks but not all-cause mortality. Nevertheless, in a substudy of the Prospective Randomized Milrinone Survival Evaluation (PROMISE) trial, high burden of ventricular ectopy on Holter recordings predicted SCD.[17] Finally, no continuous measurement of STV-QT during the 24 hours was performed. The current method of FSA is semi-automatically which requires manual identification of fiducial points. Currently, a fully automatic version is being developed and the first results show accurate STV-QT measurements in simulated data.[36]

## Conclusions

STV-QT shows high intra- and inter-individual 24-hour variability with peaks in the early morning and late afternoon in high AS patients. Studies on the circadian variation of SCD show a similar circadian profile. Determination of STV-QT at these time point might be more sensitive in identifying the patient at risk. It is therefore plausible to propose that the evaluation of the predictive power of STV-QT in the EU-CERT-ICD study concentrates primarily on these time points.

## Supporting information

**S1 File. The used data set is publicly available via PLOS ONE.**  
(XLSX)

## Acknowledgments

EU-CERT-ICD has received funding from the European Community's Seventh Framework Programme FP7/2007-2013 under grant agreement no. 602299,

## Author Contributions

**Conceptualization:** Marc A. Vos.

**Formal analysis:** David J. Sprenkeler.

**Funding acquisition:** Anton E. Tuinenburg, Markus Zabel.

**Investigation:** David J. Sprenkeler.

**Methodology:** Marek Malik, Marc A. Vos.

**Project administration:** Anton E. Tuinenburg, Markus Zabel.

**Resources:** Henk J. Ritsema van Eck, Marek Malik.

**Software:** Henk J. Ritsema van Eck.

**Supervision:** Anton E. Tuinenburg, Markus Zabel, Marc A. Vos.

**Visualization:** David J. Sprenkeler.

**Writing – original draft:** David J. Sprenkeler.

**Writing – review & editing:** Anton E. Tuinenburg, Marek Malik, Marc A. Vos.

## References

1. Adabag AS, Luepker R V, Roger VL, Gersh BJ. Sudden cardiac death: epidemiology and risk factors. *Nat Rev Cardiol*. 2010 Apr; 7(4):216–25. <https://doi.org/10.1038/nrcardio.2010.3> PMID: 20142817
2. Moss AJ, Zareba W, Hall WJ, Klein H, Wilber DJ, Cannom DS, et al. Prophylactic implantation of a defibrillator in patients with myocardial infarction and reduced ejection fraction. *N Engl J Med*. 2002 Mar 21; 346(12):877–83. <https://doi.org/10.1056/NEJMoa013474> PMID: 11907286
3. Bardy GH, Lee KL, Mark DB, Poole JE, Packer DL, Boineau R, et al. Amiodarone or an implantable cardioverter-defibrillator for congestive heart failure. *N Engl J Med*. 2005 Jan 20; 352(3):225–37. <https://doi.org/10.1056/NEJMoa043399> PMID: 15659722
4. Epstein AE, Dimarco JP, Ellenbogen KA, Estes NAM, Freedman RA, Gettes LS, et al. ACC/AHA/HRS 2008 Guidelines for device-based therapy of cardiac rhythm abnormalities. *Heart Rhythm*. 2008 Jun; 5(6):e1–62. <https://doi.org/10.1016/j.hrthm.2008.04.014> PMID: 18534360
5. Stecker EC, Vickers C, Waltz J, Socoteanu C, John BT, Mariani R, et al. Population-based analysis of sudden cardiac death with and without left ventricular systolic dysfunction: two-year findings from the Oregon Sudden Unexpected Death Study. *J Am Coll Cardiol*. 2006 Mar 21; 47(6):1161–6. <https://doi.org/10.1016/j.jacc.2005.11.045> PMID: 16545646
6. Sabbag A, Suleiman M, Laish-Farkash A, Samania N, Kazatsker M, Goldenberg I, et al. Contemporary rates of appropriate shock therapy in patients who receive implantable device therapy in a real-world setting: From the Israeli ICD Registry. *Heart Rhythm*. 2015 Dec; 12(12):2426–33.
7. Vandenberg B, Garweg C, Voros G, FLORÉ V, MARYNISSEN T, STICHERLING C, et al. Changes in Implantation Patterns and Therapy Rates of Implantable Cardioverter Defibrillators over Time in Ischemic and Dilated Cardiomyopathy Patients. *Pacing Clin Electrophysiol*. 2016 Aug; 39(8):848–57. <https://doi.org/10.1111/pace.12891> PMID: 27198580
8. van Welsenes GH, van Rees JB V, Thijssen J, TRINES SA, VAN ERVEN L, SCHALIJ MJ, et al. Primary Prevention Implantable Cardioverter Defibrillator Recipients: The Need for Defibrillator Back-Up After an Event-Free First Battery Service-Life. *J Cardiovasc Electrophysiol*. 2011 Dec; 22(12):1346–50. <https://doi.org/10.1111/j.1540-8167.2011.02134.x> PMID: 21777328
9. Baumert M, Porta A, Vos MA, Malik M, Couderc J-P, Laguna P, et al. QT interval variability in body surface ECG: measurement, physiological basis, and clinical value: position statement and consensus guidance endorsed by the European Heart Rhythm Association jointly with the ESC Working Group on Cardiac Cellular Electrophysiology. *Europace*. 2016 Jun; 18(6):925–44. <https://doi.org/10.1093/europace/euv405> PMID: 26823389
10. Hinterseer M, Beckmann B- M, Thomsen MB, Pfeufer A, Dalla Pozza R, Loeff M, et al. Relation of increased short-term variability of QT interval to congenital long-QT syndrome. *Am J Cardiol*. 2009 May 1; 103(9):1244–8. <https://doi.org/10.1016/j.amjcard.2009.01.011> PMID: 19406266
11. Hinterseer M, Thomsen MB, Beckmann B- M, Pfeufer A, Schimpf R, Wichmann H-E, et al. Beat-to-beat variability of QT intervals is increased in patients with drug-induced long-QT syndrome: a case control pilot study. *Eur Heart J*. 2008 Jan; 29(2):185–90. <https://doi.org/10.1093/eurheartj/ehm586> PMID: 18156612
12. Hinterseer M, Beckmann B- M, Thomsen MB, Pfeufer A, Ulbrich M, Sinner MF, et al. Usefulness of short-term variability of QT intervals as a predictor for electrical remodeling and proarrhythmia in patients with nonischemic heart failure. *Am J Cardiol*. 2010 Jul 15; 106(2):216–20. <https://doi.org/10.1016/j.amjcard.2010.02.033> PMID: 20599006
13. McMurray JJV, Adamopoulos S, Anker SD, Auricchio A, Böhm M, Dickstein K, et al. ESC Guidelines for the diagnosis and treatment of acute and chronic heart failure 2012. *Eur J Heart Fail*. 2012 Aug; 14(8):803–69. <https://doi.org/10.1093/eurjhf/hfs105> PMID: 22828712
14. Ritsema van Eck HJ. Fiducial segment averaging to improve cardiac time interval estimates. *J Electrocardiol*. 2002; 35 Suppl:89–93. <https://doi.org/10.1054/jelc.2002.37160> PMID: 12539104
15. Thomsen MB, Verduyn SC, Stengl M, Beekman JDM, de Pater G, van Opstal J, et al. Increased short-term variability of repolarization predicts d-sotalol-induced torsades de pointes in dogs. *Circulation*. 2004 Oct 19; 110(16):2453–9. <https://doi.org/10.1161/01.CIR.0000145162.64183.C8> PMID: 15477402
16. Seegers J, Bergau L, Expósito PM, Bauer A, Fischer TH, Lüthje L, et al. Prediction of Appropriate Shocks Using 24-Hour Holter Variables and T-Wave Alternans After First Implantable Cardioverter-Defibrillator Implantation in Patients With Ischemic or Nonischemic Cardiomyopathy. *Am J Cardiol*. 2016 Jul 1; 118(1):86–94. <https://doi.org/10.1016/j.amjcard.2016.04.016> PMID: 27189815
17. Teerlink JR, Jalaluddin M, Anderson S, Kukin ML, Eichhorn EJ, Francis G, et al. Ambulatory ventricular arrhythmias in patients with heart failure do not specifically predict an increased risk of sudden death.

- PROMISE (Prospective Randomized Milrinone Survival Evaluation) Investigators. *Circulation*. 2011 (1):40–6. PMID: [10618302](#)
18. Varkevisser R, Wijers SC, van der Heyden MAG, Beekman JDM, Meine M, Vos MA. Beat-to-beat variability of repolarization as a new biomarker for proarrhythmia in vivo. *Heart Rhythm*. 2012 Oct; 9(10):1718–26. <https://doi.org/10.1016/j.hrthm.2012.05.016> PMID: [22609158](#)
  19. Verrier RL, Klingenhoben T, Malik M, El-Sherif N, Exner D V, Hohnloser SH, et al. Microvolt T-wave alternans physiological basis, methods of measurement, and clinical utility—consensus guideline by International Society for Holter and Noninvasive Electrocardiology. *J Am Coll Cardiol*. 2011 Sep 20; 58(13):1309–24. <https://doi.org/10.1016/j.jacc.2011.06.029> PMID: [21920259](#)
  20. Berger RD, Kasper EK, Baughman KL, Marban E, Calkins H, Tomaselli GF. Beat-to-beat QT interval variability: novel evidence for repolarization lability in ischemic and nonischemic dilated cardiomyopathy. *Circulation*. 1997 Sep 2; 96(5):1557–65. PMID: [9315547](#)
  21. Muller JE, Ludmer PL, Willich SN, Tofler GH, Aylmer G, Klangos I, et al. Circadian variation in the frequency of sudden cardiac death. *Circulation*. 1987 Jan; 75(1):131–8. PMID: [3791599](#)
  22. Willich SN, Levy D, Rocco MB, Tofler GH, Stone PH, Muller JE. Circadian variation in the incidence of sudden cardiac death in the Framingham Heart Study population. *Am J Cardiol*. 1987 Oct 1; 60(10):801–6. PMID: [3661393](#)
  23. Tofler GH, Gebara OC, Mittleman MA, Taylor P, Siegel W, Venditti FJ, et al. Morning peak in ventricular tachyarrhythmias detected by time of implantable cardioverter/defibrillator therapy. The CPI Investigators. *Circulation*. 1995 Sep 1; 92(5):1203–8. PMID: [7648666](#)
  24. Behrens S, Galecka M, Brüggemann T, Ehlers C, Willich SN, Ziss W, et al. Circadian variation of sustained ventricular tachyarrhythmias terminated by appropriate shocks in patients with an implantable cardioverter defibrillator. *Am Heart J*. 1995 Jul; 130(1):79–84. PMID: [7611127](#)
  25. Ogawa M, Zhou S, Tan AY, Song J, Gholmieh G, Fishbein MC, et al. Left stellate ganglion and vagal nerve activity and cardiac arrhythmias in ambulatory dogs with pacing-induced congestive heart failure. *J Am Coll Cardiol*. 2007 Jul 24; 50(4):335–43. <https://doi.org/10.1016/j.jacc.2007.03.045> PMID: [17659201](#)
  26. Piccirillo G, Moscucci F, D'Alessandro G, Pascucci M, Rossi P, Han S, et al. Myocardial repolarization dispersion and autonomic nerve activity in a canine experimental acute myocardial infarction model. *Heart Rhythm*. 2014 Jan; 11(1):110–8.
  27. Han S, Kobayashi K, Joung B, Piccirillo G, Maruyama M, Vinters H V, et al. Electroanatomic remodeling of the left stellate ganglion after myocardial infarction. *J Am Coll Cardiol*. 2012 Mar 6; 59(10):954–61. <https://doi.org/10.1016/j.jacc.2011.11.030> PMID: [22381432](#)
  28. Zhou S, Jung B-C, Tan AY, Trang VQ, Gholmieh G, Han S-W, et al. Spontaneous stellate ganglion nerve activity and ventricular arrhythmia in a canine model of sudden death. *Heart Rhythm*. 2008 Jan; 5(1):131–9. <https://doi.org/10.1016/j.hrthm.2007.09.007> PMID: [18055272](#)
  29. Yeragani VK, Pohl R, Jampala VC, Balon R, Kay J, Igel G. Effect of posture and isoproterenol on beat-to-beat heart rate and QT variability. *Neuropsychobiology*. 2000; 41(3):113–23. PMID: [10754424](#)
  30. Orosz A, Baczkó I, Nyiraty S, Körei AE, Putz Z, Takács R, et al. Increased Short-Term Beat-to-Beat QT Interval Variability in Patients with Impaired Glucose Tolerance. *Front Endocrinol (Lausanne)*. 2017 Jun 13; 8.
  31. Piccirillo G, Cacciafesta M, Lionetti M, Nocco M, Di Giuseppe V, Moisé A, et al. Influence of age, the autonomic nervous system and anxiety on QT-interval variability. *Clin Sci (Lond)*. 2001 Oct; 101(4):429–38.
  32. Piccirillo G, Quaglione R, Nocco M, Naso C, Moisé A, Lionetti M, et al. Effects of long-term beta-blocker (metoprolol or carvedilol) therapy on QT variability in subjects with chronic heart failure secondary to ischemic cardiomyopathy. *Am J Cardiol*. 2002 Nov 15; 90(10):1113–7. PMID: [12423713](#)
  33. Piccirillo G, Magri D, Ogawa M, Song J, Chong VJ, Han S, et al. Autonomic nervous system activity measured directly and QT interval variability in normal and pacing-induced tachycardia heart failure dogs. *J Am Coll Cardiol*. 2009 Aug 25; 54(9):840–50. <https://doi.org/10.1016/j.jacc.2009.06.008> PMID: [19695465](#)
  34. Johnson DM, Heijman J, Pollard CE, Valentin J-P, Crijns HJGM, Abi-Gerges N, et al. IKs restricts excessive beat-to-beat variability of repolarization during beta-adrenergic receptor stimulation. *J Mol Cell Cardiol*. 2010 Jan; 48(1):122–30. <https://doi.org/10.1016/j.yjmcc.2009.08.033> PMID: [19744496](#)
  35. Nattel S, Maguy A, Le Bouter S, Yeh Y-H. Arrhythmogenic Ion-Channel Remodeling in the Heart: Heart Failure, Myocardial Infarction, and Atrial Fibrillation. *Physiol Rev*. 2007 Apr 1; 87(2):425–56. <https://doi.org/10.1152/physrev.00014.2006> PMID: [17429037](#)
  36. Rijnbeek PR, van den Berg ME, van Herpen G, Ritsema van Eck HJ, Kors JA. Validation of automatic measurement of QT interval variability. *PLoS One*. 2017 Apr 12; 12(4):e0175087. <https://doi.org/10.1371/journal.pone.0175087> PMID: [28403196](#)
